# Supplementary material for: Real-World Utilization of Target- and Immunotherapies for Lung Cancer: A Scoping Review of Studies Based on Routinely Collected Electronic Healthcare Data
Source: Int J Environ Res Public Health. 2021 Jul 19;18(14):7679. doi: 10.3390/ijerph18147679 (PMC8305284; doi:10.3390/ijerph18147679)
Supplement: Supplementary file 1 [file ijerph-18-07679-s001.zip]

Archive with 8 entries (8 files):
- __MACOSX/._Table S1.docx
- __MACOSX/._Table S2.docx
- __MACOSX/._Table S3.docx
- __MACOSX/._Table S4.docx
- Table S1.pdf
- Table S2.pdf
- Table S3.pdf
- Table S4.pdf
