# Supplementary material for: Real-World Utilization of Target- and Immunotherapies for Lung Cancer: A Scoping Review of Studies Based on Routinely Collected Electronic Healthcare Data
Source: Int J Environ Res Public Health. 2021 Jul 19;18(14):7679. doi: 10.3390/ijerph18147679 (PMC8305284; doi:10.3390/ijerph18147679)
Supplement: Supplementary file 1 [file ijerph-18-07679-s001.zip › Table S2.pdf]

**Table S2. Sources of the data used by the included studies per study variable.**

| Study reference                  | DEMOGRAPHIC CHARACTERISTICS    |                                |                                | FOLLOW-UP DURATION                      | CANCER-RELATED CHARACTERISTICS |                                |                                    |                                | PATIENT-RELATED CHARACTERISTICS |                                |                                |                                |                                | PROCEDURES                     |                                | LUNG CANCER PHARMACOTHERAPY    |                                |                                                      |                                |                                                    |                                                    |                                |
|----------------------------------|--------------------------------|--------------------------------|--------------------------------|-----------------------------------------|--------------------------------|--------------------------------|------------------------------------|--------------------------------|---------------------------------|--------------------------------|--------------------------------|--------------------------------|--------------------------------|--------------------------------|--------------------------------|--------------------------------|--------------------------------|------------------------------------------------------|--------------------------------|----------------------------------------------------|----------------------------------------------------|--------------------------------|
|                                  | Age                            | Gender                         | Area/hospital/region           | Death/end of follow-up                  | Histology                      | Stage                          | Molecular/genetic characterization | Tumor response                 | Disease progression             | Comorbidities                  | Concomitant pharmacotherapies  | Performance status             | Smoking status                 | Race                           | Surgery                        | Radiotherapy                   | Prescription                   | Dispensing/administration (Outpatient/Inpatient use) | Indication                     | Dose                                               | Duration                                           | Treatment line                 |
| Spence, 2017                     | Administrative data            | Administrative data            | Administrative data            | - Administrative data - Cancer registry | Cancer Registry                | Cancer registry                | -                                  | -                              | -                               | ns                             | -                              | -                              | Medical records/Health records | Medical records/Health records | -                              | -                              | -                              | Medical records/Health records                       | -                              | -                                                  | -                                                  | ns                             |
| Abernethy, 2017                  | Medical records/Health records | Medical records/Health records | -                              | ns                                      | Medical records/Health records | Medical records/Health records | Medical records/Health records     | -                              | -                               | -                              | -                              | -                              | Medical records/Health records | Medical records/Health records | -                              | -                              | Medical records/Health records | -                                                    | Medical records/Health records | Medical records/Health records                     | Medical records/Health records                     | Medical records/Health records |
| Wang et al. 2017                 | ns                             | ns                             | ns                             | ns                                      | ns                             | ns                             | ns                                 | -                              | -                               | ns                             | -                              | -                              | ns                             | -                              | ns                             | ns                             | ns                             | -                                                    | -                              | -                                                  | ns                                                 | ns                             |
| Ding et al. 2017                 | Medical records/Health records | Medical records/Health records | -                              | Medical records/Health records          | Medical records/Health records | Medical records/Health records | Medical records/Health records     | -                              | Medical records/Health records  | -                              | -                              | -                              | Medical records/Health records | -                              | -                              | -                              | -                              | Medical records/Health records                       | -                              | -                                                  | Medical records/Health records                     | Medical records/Health records |
| Golden et al. 2017               | ns                             | ns                             | ns                             | ns                                      | -                              | ns                             | -                                  | -                              | -                               | ns                             | ns                             | -                              | -                              | ns                             | -                              | -                              | -                              | Administrative data                                  | -                              | -                                                  | -                                                  | ns                             |
| Hopson et al. 2018               | Administrative data            | Administrative data            | Administrative data            | -                                       | -                              | Administrative data            | -                                  | -                              | -                               | -                              | -                              | -                              | -                              | Administrative data            | -                              | -                              | -                              | Administrative data                                  | -                              | -                                                  | Administrative data                                | Administrative data            |
| Liang et al. 2016                | Cancer registry                | Cancer registry                | ns                             | Administrative data                     | Cancer registry                | Cancer registry                | -                                  | -                              | -                               | -                              | -                              | -                              | -                              | -                              | -                              | -                              | Administrative data            | -                                                    | ns                             | ns                                                 | ns                                                 | Administrative data            |
| Lunacek et al. 2016              | Medical records/Health records | Medical records/Health records | Medical records/Health records | Administrative data                     | Medical records/Health records | Medical records/Health records | -                                  | Medical records/Health records | Medical records/Health records  | Medical records/Health records | Medical records/Health records | Medical records/Health records | Medical records/Health records | -                              | Medical records/Health records | Medical records/Health records | Medical records/Health records | -                                                    | -                              | -                                                  | Medical records/Health records                     | Medical records/Health records |
| Nadler et al. 2018               | Medical records/Health records | Medical records/Health records | Medical records/Health records | Administrative data                     | ns                             | ns                             | ns                                 | -                              | -                               | -                              | -                              | ns                             | ns                             | ns                             | -                              | ns                             | ns                             | -                                                    | -                              | -                                                  | -                                                  | ns                             |
| Peters et al. 2017               | ns                             | ns                             | ns                             | Cancer registry                         | Cancer registry                | Cancer registry                | -                                  | -                              | ns                              | Medical records/Health records | -                              | Medical records/Health records | -                              | -                              | -                              | -                              | Medical records/Health records | Medical records/Health records                       | -                              | Medical records/Health records                     | Medical records/Health records                     | Medical records/Health records |
| Broder et al. 2018               | Administrative data            | Administrative data            | Administrative data            | ns                                      | -                              | -                              | -                                  | -                              | -                               | -                              | -                              | -                              | -                              | -                              | -                              | -                              | -                              | Medical records/Health records                       | -                              | -                                                  | ns                                                 | ns                             |
| Dawe et al. 2016                 | Cancer registry                | Cancer registry                | -                              | Administrative data                     | Cancer registry                | ns                             | -                                  | -                              | -                               | Administrative data            | -                              | -                              | -                              | -                              | Administrative data            | Administrative data            | Medical records/Health records | -                                                    | -                              | -                                                  | ns                                                 | ns                             |
| Kasymjanov et al. 2017           | Cancer registry                | Cancer registry                | Cancer registry                | -                                       | Cancer registry                | Cancer registry                | ns                                 | -                              | -                               | -                              | -                              | Cancer registry                | Cancer registry                | -                              | Cancer registry                | Cancer registry                | ns                             | ns                                                   | -                              | -                                                  | ns                                                 | -                              |
| McKay et al. 2016                | Medical records/Health records | Medical records/Health records | Medical records/Health records | Medical records/Health records          | Medical records/Health records | Medical records/Health records | Medical records/Health records     | -                              | -                               | -                              | -                              | -                              | -                              | Medical records/Health records | Medical records/Health records | -                              | Medical records/Health records | -                                                    | -                              | Medical records/Health records                     | Medical records/Health records                     | Medical records/Health records |
| Dalal et al. 2018                | Administrative data            | Administrative data            | -                              | ns                                      | -                              | -                              | -                                  | -                              | -                               | Administrative data            | -                              | -                              | -                              | -                              | Administrative data            | Administrative data            | Administrative data            | -                                                    | -                              | -                                                  | Administrative data                                | -                              |
| Shen 2017                        | Administrative data            | Administrative data            | Administrative data            | Administrative data                     | -                              | Administrative data            | Administrative data                | -                              | -                               | -                              | -                              | -                              | -                              | -                              | -                              | -                              | -                              | Administrative data                                  | -                              | -                                                  | -                                                  | -                              |
| Clin Lung Cancer 2017            | Administrative data            | Administrative data            | Administrative data            | Administrative data                     | -                              | -                              | -                                  | -                              | -                               | -                              | -                              | -                              | -                              | -                              | -                              | -                              | -                              | -                                                    | -                              | -                                                  | -                                                  | -                              |
| Shinde et al. 2016               | Administrative data            | Administrative data            | -                              | -                                       | -                              | -                              | Administrative data                | -                              | -                               | -                              | -                              | -                              | -                              | -                              | -                              | -                              | Administrative data            | -                                                    | -                              | -                                                  | -                                                  | -                              |
| Aguilar et. 2018                 | Medical records/Health records | Medical records/Health records | Medical records/Health records | Medical records/Health records          | Medical records/Health records | Medical records/Health records | Medical records/Health records     | -                              | -                               | Medical records/Health records | -                              | Medical records/Health records | -                                                    | Medical records/Health records | Medical records/Health records                     | Medical records/Health records                     | Medical records/Health records |
| Cramer-van der Welle et al. 2018 | Cancer registry                | Cancer registry                | -                              | Cancer registry                         | Cancer registry                | Cancer registry                | Cancer registry                    | -                              | -                               | Medical records/Health records | -                              | Medical records/Health records | -                              | -                              | -                              | -                              | Medical records/Health records | Medical records/Health records                       | -                              | -                                                  | Medical records/Health records                     | Medical records/Health records |
| Winfree et al. 2018              | Medical records/Health records | Medical records/Health records | -                              | Medical records/Health records          | Medical records/Health records | Medical records/Health records | Medical records/Health records     | Medical records/Health records | Medical records/Health records  | -                              | -                              | Medical records/Health records | Medical records/Health records | Medical records/Health records | -                              | -                              | Medical records/Health records | -                                                    | Medical records/Health records | Medical records/Health records                     | Medical records/Health records                     | Medical records/Health records |
| Arunchalam et al. 2018           | Cancer registry                | Cancer registry                | -                              | -                                       | ns                             | ns                             | ns                                 | -                              | -                               | -                              | -                              | -                              | -                              | ns                             | ns                             | -                              | ns                             | -                                                    | -                              | -                                                  | ns                                                 | ns                             |
| Bittoni et al. 2018              | Cancer registry                | Cancer registry                | -                              | -                                       | ns                             | ns                             | ns                                 | -                              | -                               | -                              | -                              | -                              | -                              | ns                             | ns                             | -                              | -                              | -                                                    | -                              | -                                                  | ns                                                 | ns                             |
| Davies et al. 2018               | Medical records/Health records | Medical records/Health records | -                              | ns                                      | ns                             | ns                             | Medical records/Health records     | ns                             | ns                              | -                              | -                              | ns                             | Medical records/Health records | ns                             | -                              | -                              | ns                             | -                                                    | ns                             | Medical records/Health records (physician's notes) | Medical records/Health records (physician's notes) | Medical records/Health records |
| Waterhouse et al. 2020           | Medical records/Health records | Medical records/Health records | -                              | Medical records/Health records          | Medical records/Health records | Medical records/Health records | Medical records/Health records     | -                              | -                               | -                              | -                              | Medical records/Health records | Medical records/Health records | Medical records/Health records | -                              | -                              | Medical records/Health records | -                                                    | -                              | -                                                  | Medical records/Health records                     | Medical records/Health records |

|                     |                                |                                |                                |                                |                                |                                |                                |                                |                                |                                |                                |                                |                                |                                |                                |                                       |                                |                                |   |   |                                |                                |
|---------------------|--------------------------------|--------------------------------|--------------------------------|--------------------------------|--------------------------------|--------------------------------|--------------------------------|--------------------------------|--------------------------------|--------------------------------|--------------------------------|--------------------------------|--------------------------------|--------------------------------|--------------------------------|---------------------------------------|--------------------------------|--------------------------------|---|---|--------------------------------|--------------------------------|
| Jahnzeb et al. 2020 | Medical records/Health records | Medical records/Health records | –                              | Medical records/Health records | –                              | –                              | Medical records/Health records | Medical records/Health records | Medical records/Health records | –                              | –                                     | Medical records/Health records | –                              | – | – | Medical records/Health records | Medical records/Health records |
| Chiang et al. 2020  | Medical records/Health records | Medical records/Health records | –                              | Medical records/Health records | –                              | –                              | Medical records/Health records | Medical records/Health records | Medical records/Health records | –                              | –                                     | Medical records/Health records | –                              | – | – | –                              | Medical records/Health records |
| Bobbili et al. 2019 | Cancer registry                | Cancer registry                | –                              | –                              | Cancer registry                | Cancer registry                | ns                             | –                              | –                              | Administrative data            | ns                             | ns                             | –                              | ns                             | –                              | Cancer registry / administrative data | –                              | ns                             | – | – | Administrative data            | –                              |
| Simeone et al. 2019 | Medical records/Health records | Medical records/Health records | Medical records/Health records | Medical records/Health records | –                              | Medical records/Health records | –                              | –                                     | Medical records/Health records | –                              | – | – | Medical records/Health records | Medical records/Health records |
| Khazin et al. 2019  | Medical records/Health records | –                              | –                              | –                              | Medical records/Health records | Medical records/Health records | Medical records/Health records | –                                     | –                              | Medical records/Health records | – | – | –                              | Medical records/Health records |
| Schwartzberg et al. | Medical records/Health records | –                              | –                              | –                              | Medical records/Health records | Medical records/Health records | Medical records/Health records | –                                     | –                              | Medical records/Health records | – | – | –                              | Medical records/Health records |
| Molife et al.       | Medical records/Health records | –                              | –                              | –                              | Medical records/Health records | Medical records/Health records | Medical records/Health records | –                                     | –                              | Medical records/Health records | – | – | Medical records/Health records | Medical records/Health records |
| Giaj Levra et al.   | Administrative data            | Administrative data            | –                              | Administrative data            | Administrative data            | –                              | –                              | –                              | –                              | Administrative data            | –                              | –                              | –                              | –                              | –                              | Administrative data                   | –                              | Administrative data            | – | – | –                              | Administrative data            |

N.S.: not specified, meaning that the variable is used in the relevant study but the source of data is not specified.
