# Supplementary material for: Real-World Utilization of Target- and Immunotherapies for Lung Cancer: A Scoping Review of Studies Based on Routinely Collected Electronic Healthcare Data
Source: Int J Environ Res Public Health. 2021 Jul 19;18(14):7679. doi: 10.3390/ijerph18147679 (PMC8305284; doi:10.3390/ijerph18147679)
Supplement: Supplementary file 1 [file ijerph-18-07679-s001.zip › Table S4.pdf]

**Table S4. Minimum and maximum median OS reported per treatment-line among stage III-IV NSCLC patients**

| <b>First-line treatments</b>                                     | <b>Min-max reported median OS, months</b> |
|------------------------------------------------------------------|-------------------------------------------|
| Bevacizumab alone or with chemotherapy (4 studies) [28,33,42,43] | 8.2-23.0                                  |
| Bevacizumab + pemetrexed (2 studies) [28,43]                     | 8.5-23.0                                  |
| Bevacizumab + carboplatin + paclitaxel (two studies) [33,42]     | 8.2-11.9                                  |
| Ramucirumab (one study) [54]                                     | 15.1                                      |
| TKIs (two studies) [28,34]                                       | 12.7-24.3                                 |
| Erlotinib (one study) [42]                                       | 14.3                                      |
| Gefitinib (one study) [42]                                       | 21.2                                      |
| Anti-ALK TKIs (one study) [48]                                   | 25.8                                      |
| Immunotherapy (one study) [54]                                   | 23.1                                      |
| Chemotherapy (five studies) [28,33,34,42,43]                     | 4.9-20.6                                  |
| <b>Second-line treatment</b>                                     |                                           |
| TKIs, (one study) [34]                                           | 11.2                                      |
| Anti-ALK TKIs (one study) [48]                                   | 24.6                                      |
| Immunotherapy, (one study) [34]                                  | 9.7                                       |
| Nivolumab (squamous NSCLC, one study) [51]                       | 9.2                                       |
| Nivolumab (non-squamous NSCLC, one study) [51]                   | 12.2                                      |
| Pembrolizumab (one study) [51]                                   | 12                                        |
| Atezolizumab (one study) [51]                                    | 13.8                                      |
| Chemotherapy, (one study) [34]                                   | 9.2                                       |
| <b>Third-line treatment</b>                                      |                                           |
| TKIs (one study) [34]                                            | 7.4                                       |
| Immunotherapy (one study) [34]                                   | 11.3                                      |
| Chemotherapy (one study) [34]                                    | 8.0                                       |
